# Supplementary material for: Trajectory of Spike-Specific B Cells Elicited by Two Doses of BNT162b2 mRNA Vaccine
Source: Preprints.org preprint supplement (doi:10.20944/preprints202305.1190.v1), 2023-05-17
Supplement: Supplementary file 1 [file supplementary]

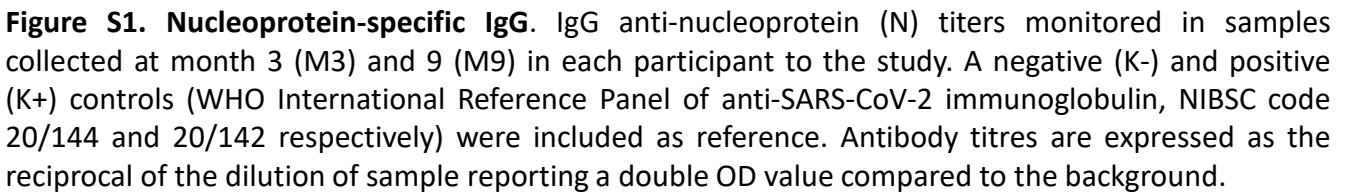

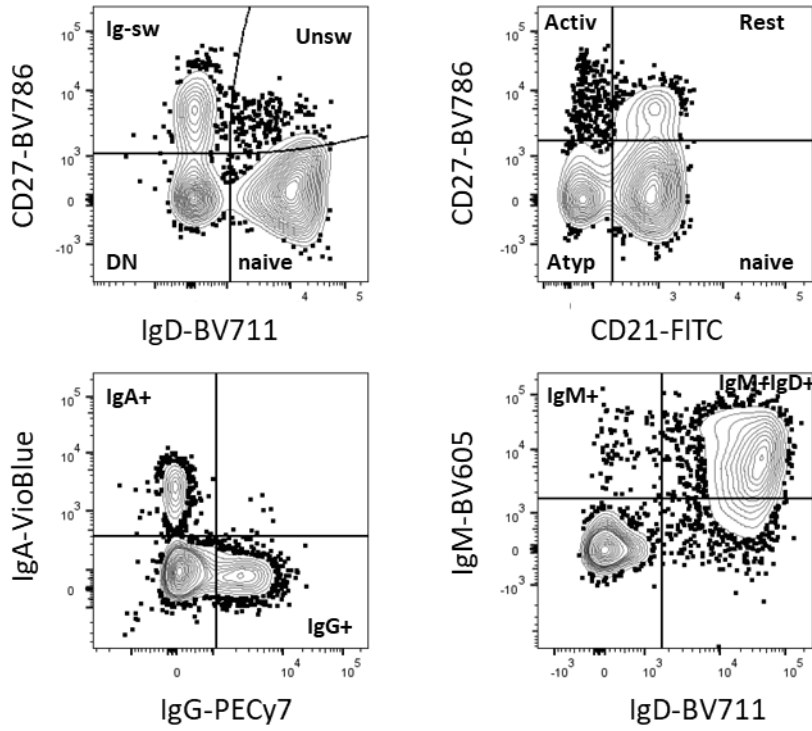

**Figure S2. Manual analysis of total B cells subsets.** Flow cytometry analysis of live CD19<sup>+/low</sup> B cells, according to the expression of IgD *versus* CD27 (CD27<sup>+</sup>IgD<sup>-</sup> switched memory, Ig-sw; CD27<sup>+</sup>IgD<sup>+</sup> unswitched, Unsw; CD27<sup>-</sup>IgD<sup>-</sup> double negative, DN; and CD27<sup>-</sup>IgD<sup>+</sup> *naïve*), CD21 *versus* CD27 (CD27<sup>+</sup>CD21<sup>-</sup> activated, Activ; CD27<sup>+</sup>CD21<sup>+</sup> resting, Rest; CD27<sup>-</sup>CD21<sup>-</sup> atypical, Atyp; and CD27<sup>-</sup>CD21<sup>+</sup> *naïve*) and IgG<sup>+</sup>, IgA<sup>+</sup>, IgD<sup>+</sup>IgM<sup>+</sup>, IgM<sup>+</sup> only.
